# Supplementary material for: Whole Genome Sequencing Reveals the Islands of Novel Polymorphisms in Two Native Aromatic Japonica Rice Landraces from Vietnam
Source: Oxford University Press journal article supplement (doi:10.1093/gbe/evx135), 2017-06-01
Supplement: evx135_SuppFig.docx [file evx135_SuppFig.docx]

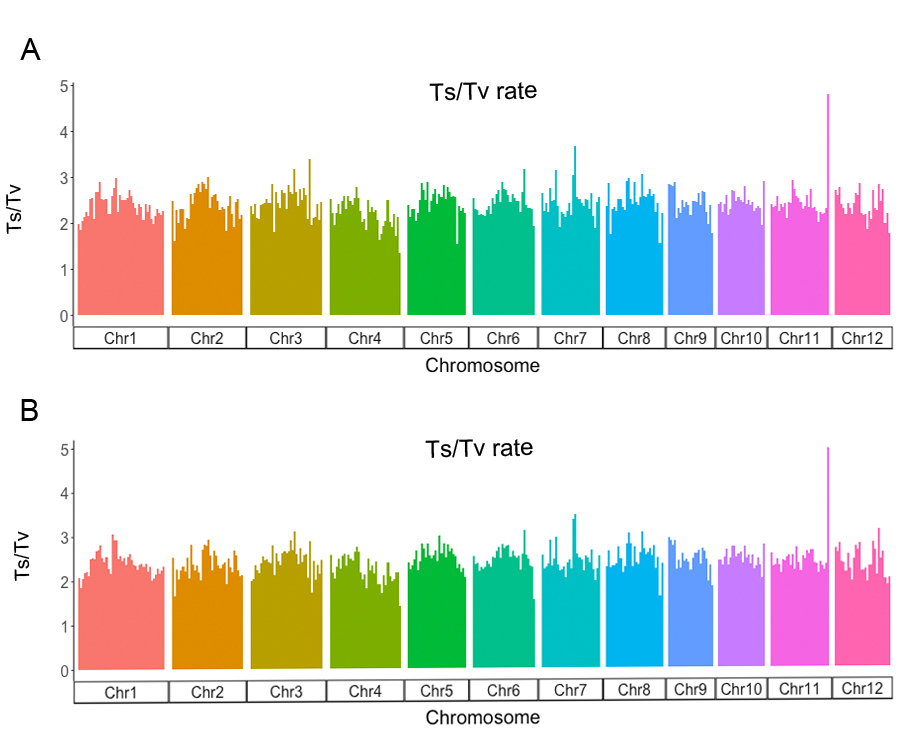


**Figure S1.** Average transition/transversion (Ts/Tv) rate per Mb window in TXBN (A) and TXHH (B) aromatic rice cultivars. Different colors correspond to different chromosomes.
