# Supplementary material for: Whole Genome Sequencing Reveals the Islands of Novel Polymorphisms in Two Native Aromatic Japonica Rice Landraces from Vietnam
Source: Oxford University Press journal article supplement (doi:10.1093/gbe/evx135), 2017-06-01
Supplement: evx135_SuppTableS1.docx [file evx135_SuppTableS1.docx]

**Table S1**. Classification of different substitution types in the total and unique SNPs detected in TXBN and TXHH.

| **Rice cultivars** | **Transition** | | **Transversion** | | | | **Ts/Tv** |
| --- | --- | --- | --- | --- | --- | --- | --- |
| A ↔ G | C ↔ T | G ↔ T | A ↔ C | A ↔ T | G ↔ C |
| **Total SNPs** | | | | | | | |
| TXBN | 472,032 | 473,411 | 101,404 | 101,905 | 109,609 | 72,461 | 2.453 |
| TXHH | 411,704 | 412,779 | 88,787 | 89,755 | 95,322 | 62,425 | 2.452 |
| **Unique SNPs** | | | | | | | |
| TXBN | 23,115 | 23,292 | 5,137 | 5,179 | 5,845 | 3,940 | 2.309 |
| TXHH | 15,553 | 15,547 | 3,245 | 3,396 | 3,712 | 2,452 | 2.429 |
